# Supplementary material for: Synthesis of 1,2-disubstituted benzimidazoles, 2-substituted benzimidazoles and 2-substituted benzothiazoles in SDS micelles
Source: Royal Society of Chemistry journal article supplement (doi:10.1039/c000047g), 2010-01-01
Supplement: c000047g.pdf [file c000047g.pdf]

Supplementary Material

Table 2, Entry 2

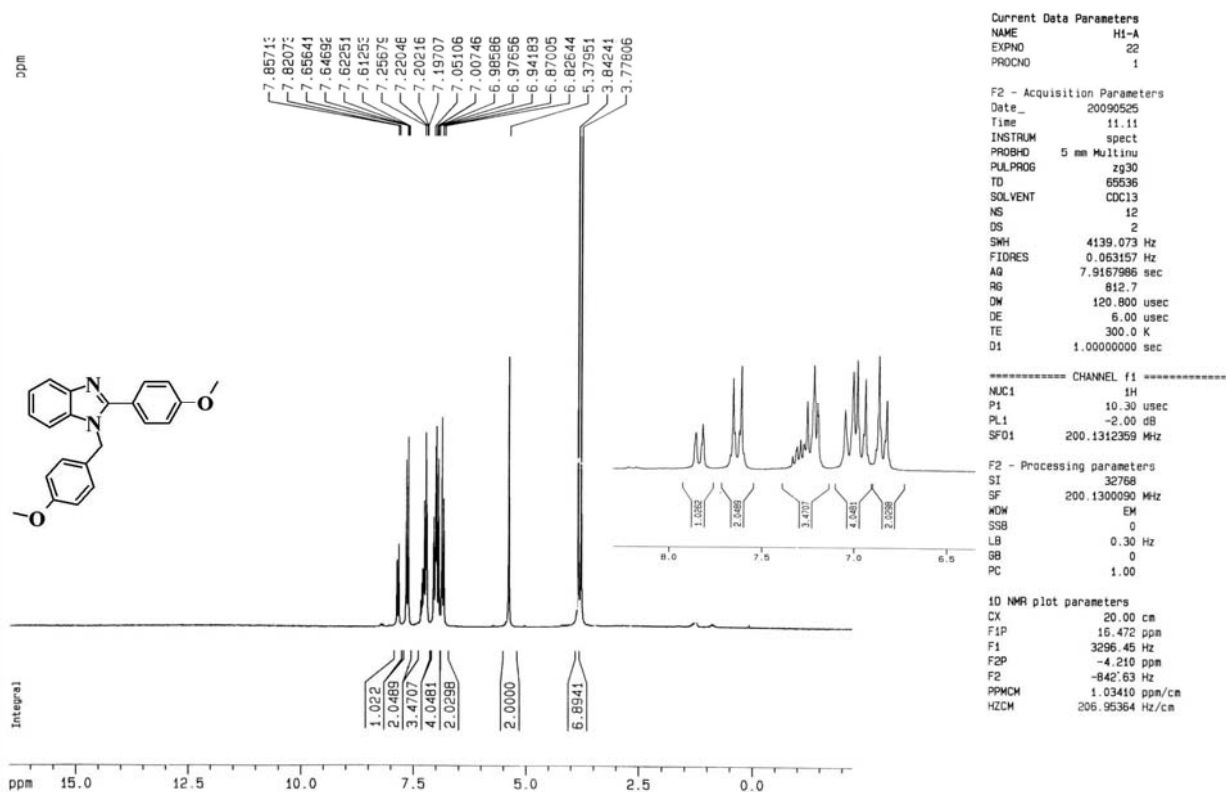

Table 2, Entry 2

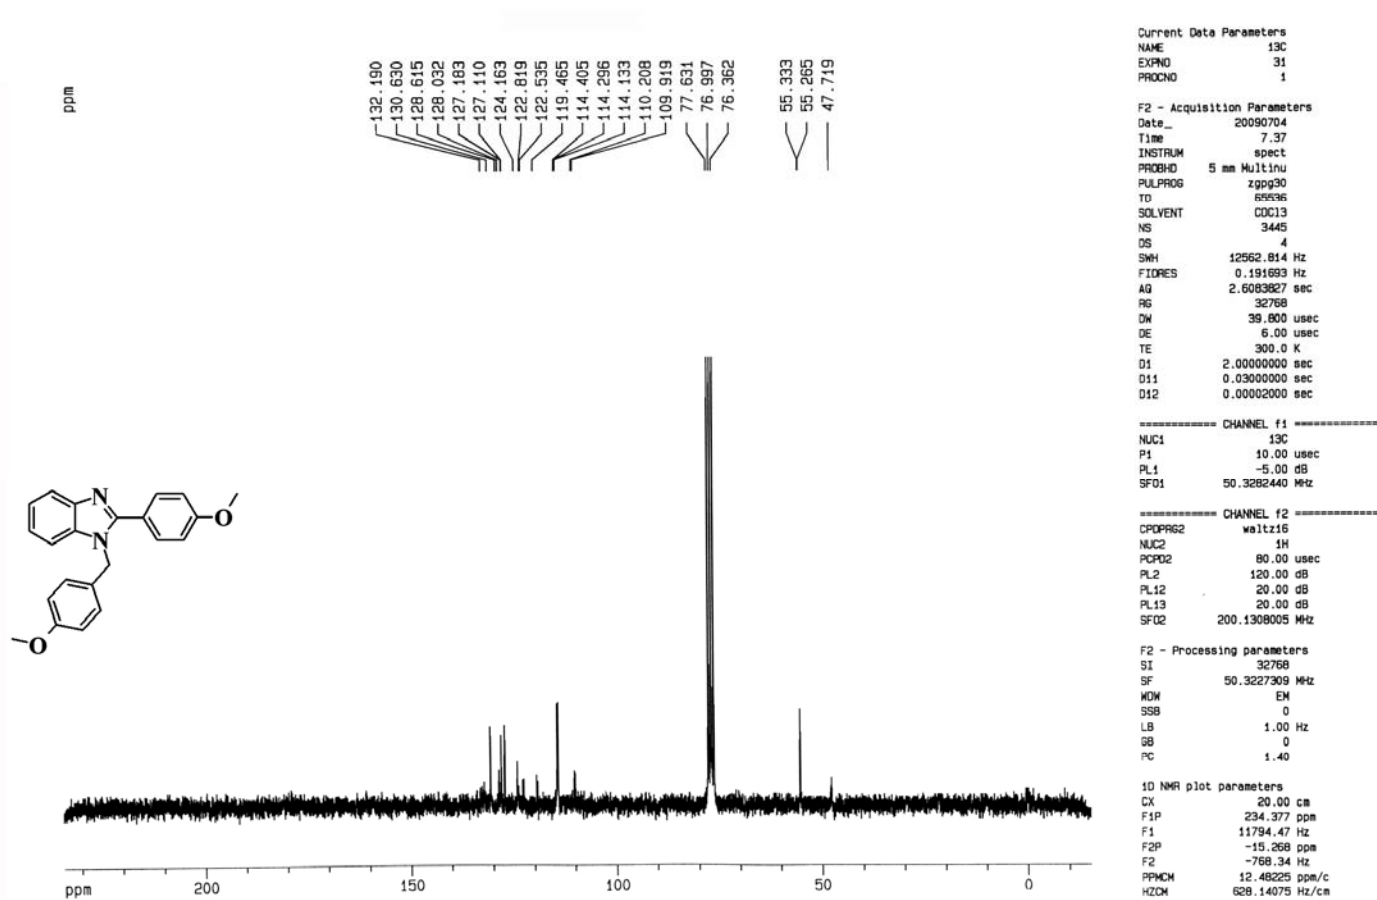

Table 2, Entry 4

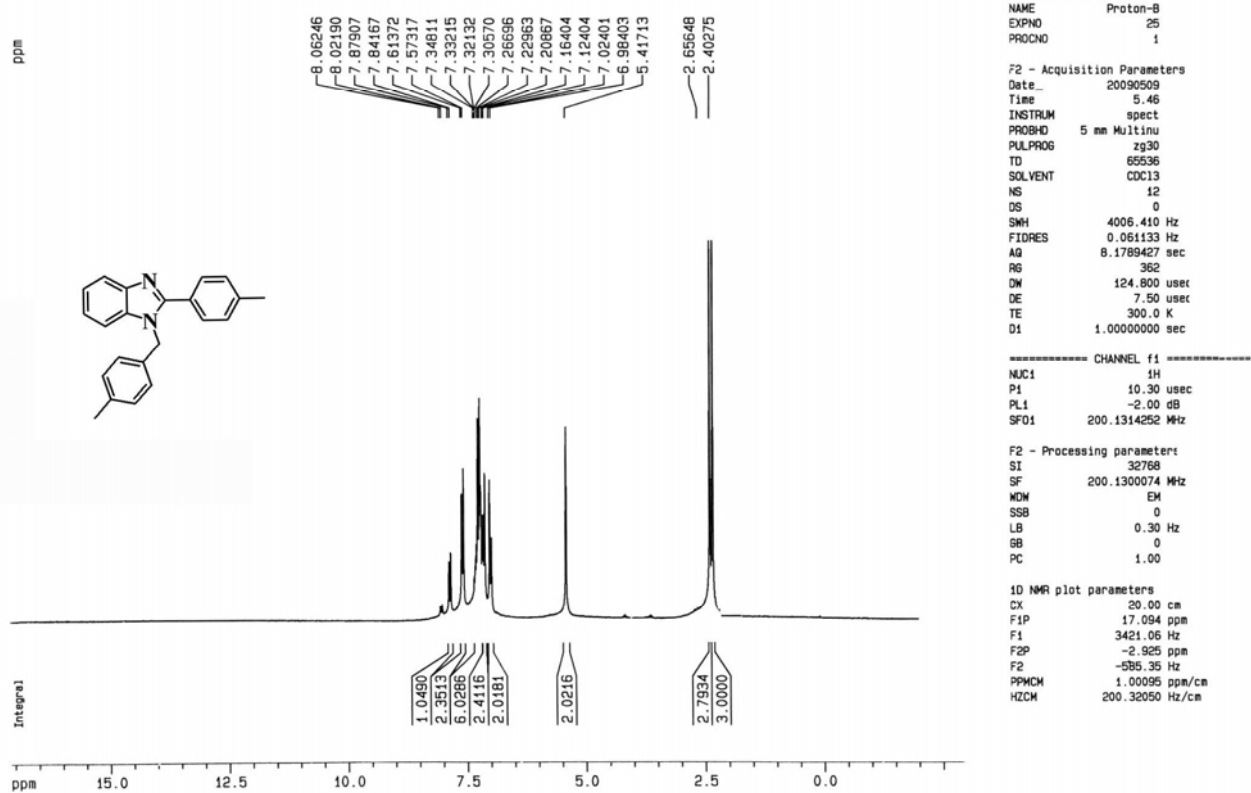

Table 2, Entry 4

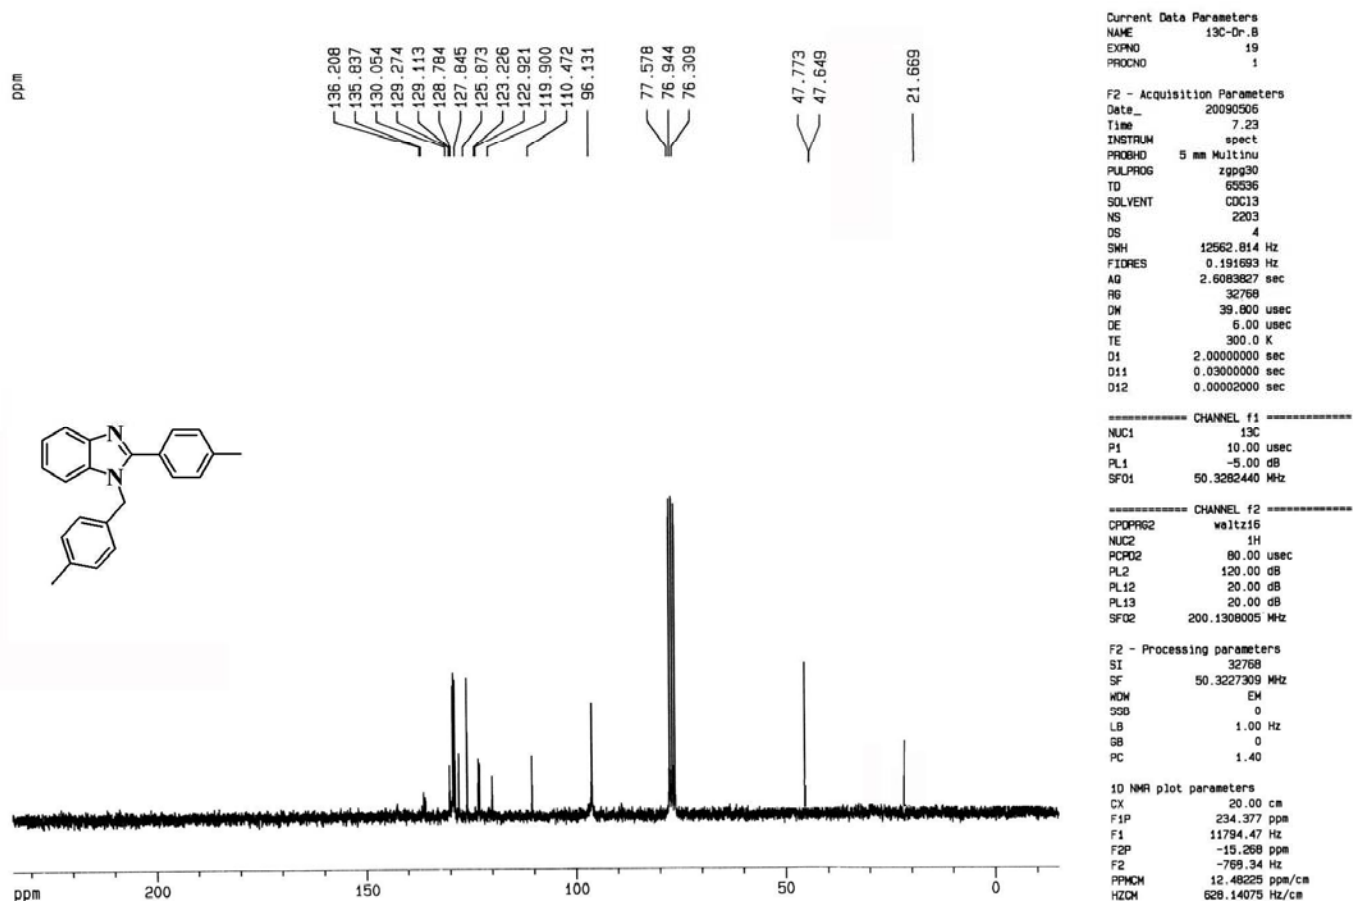

Table 3, Entry 1

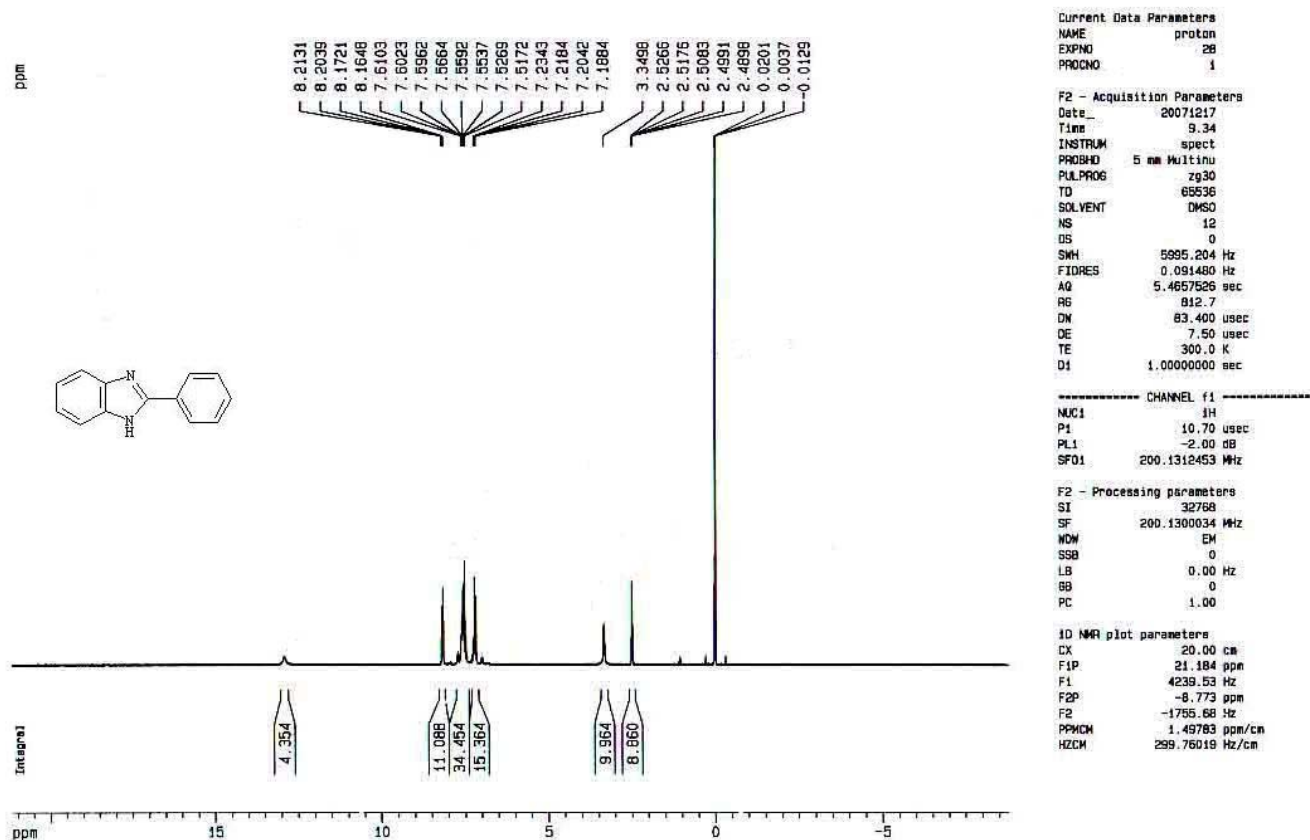

Table 3, Entry 1

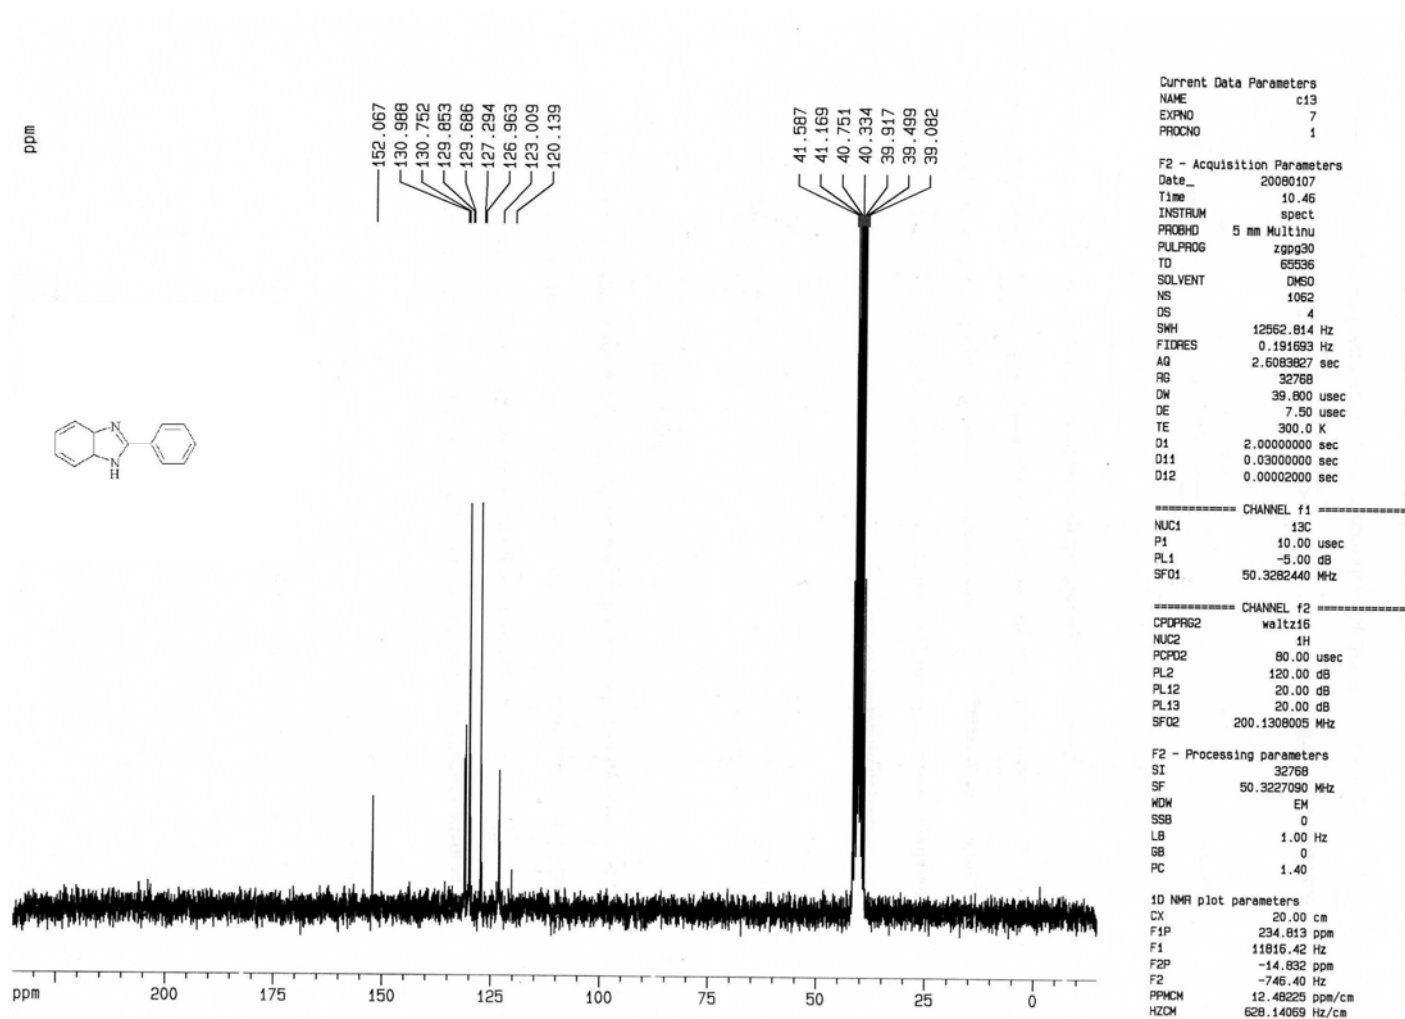

Table 3, Entry 3

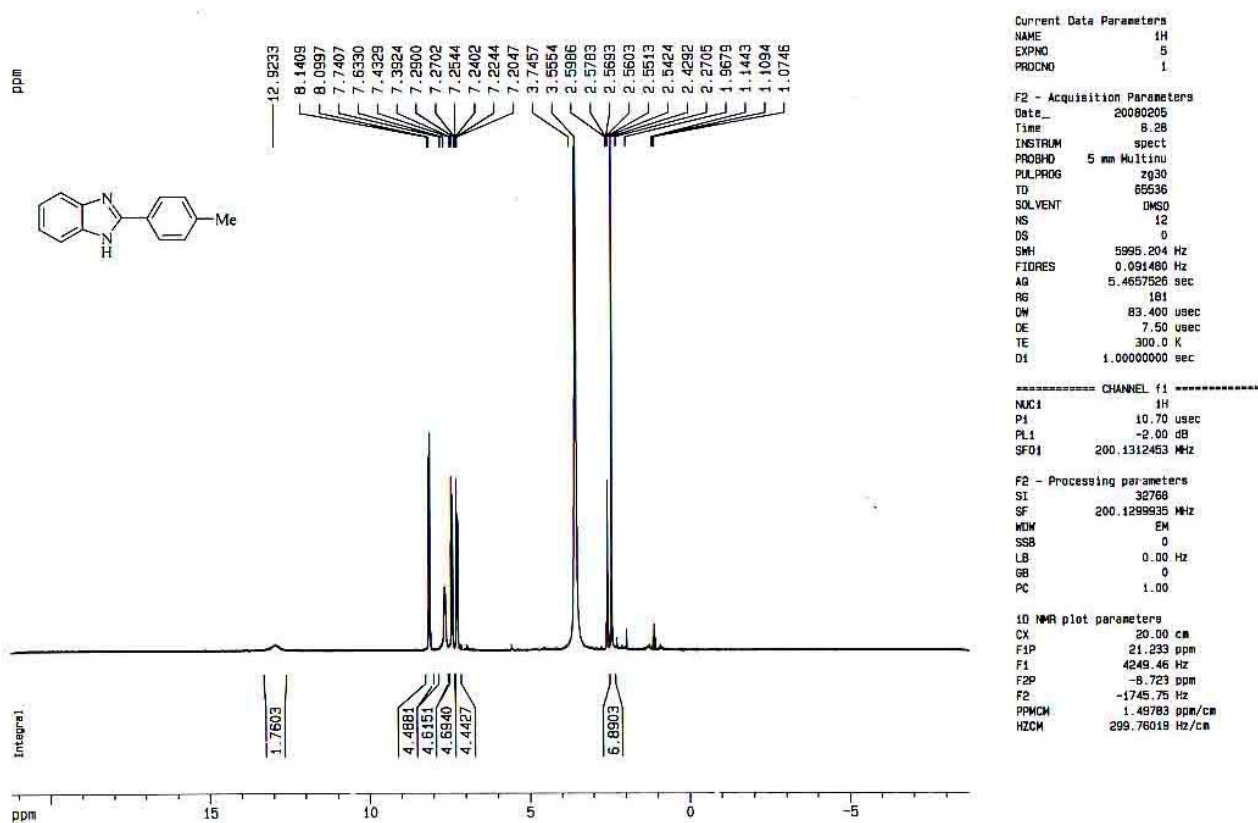

Table 3, Entry 3

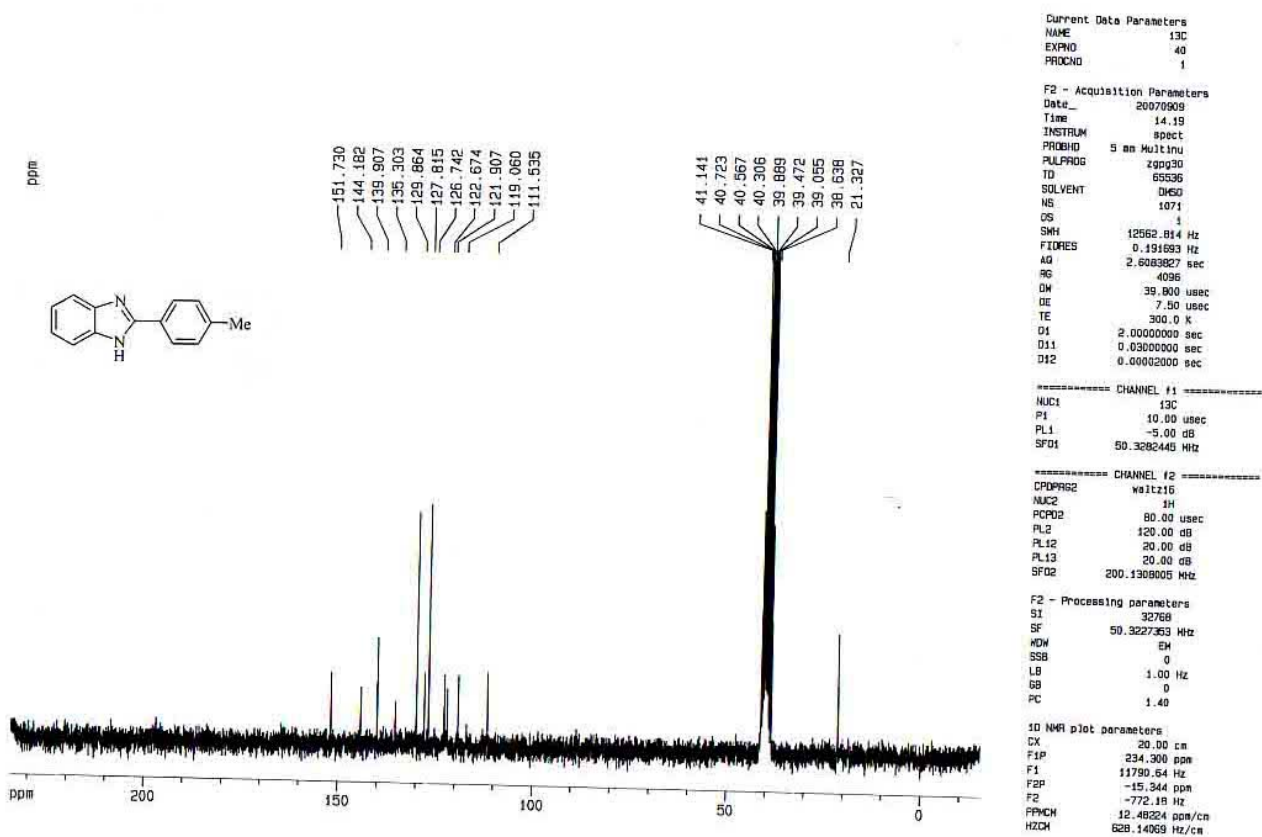

Table 3, Entry 5

Table 3, Entry 19

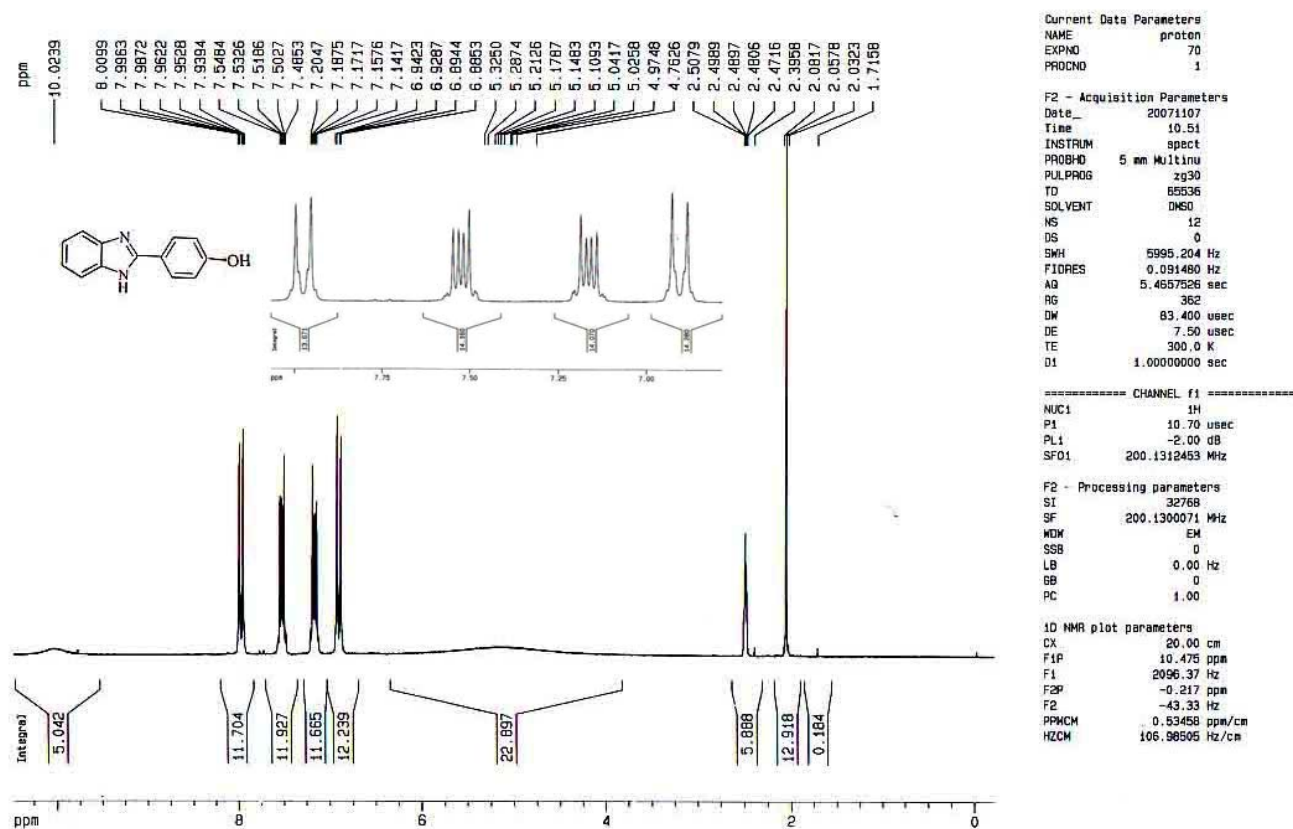

Table 3, Entry 5

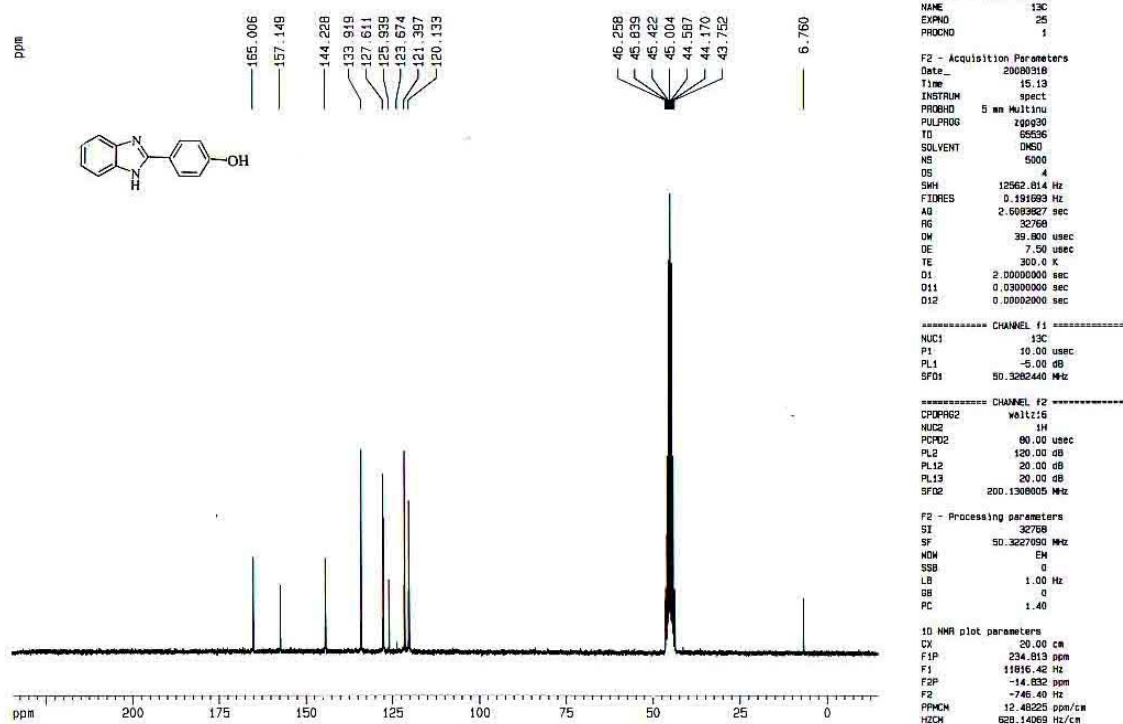

Table 3, Entry 10

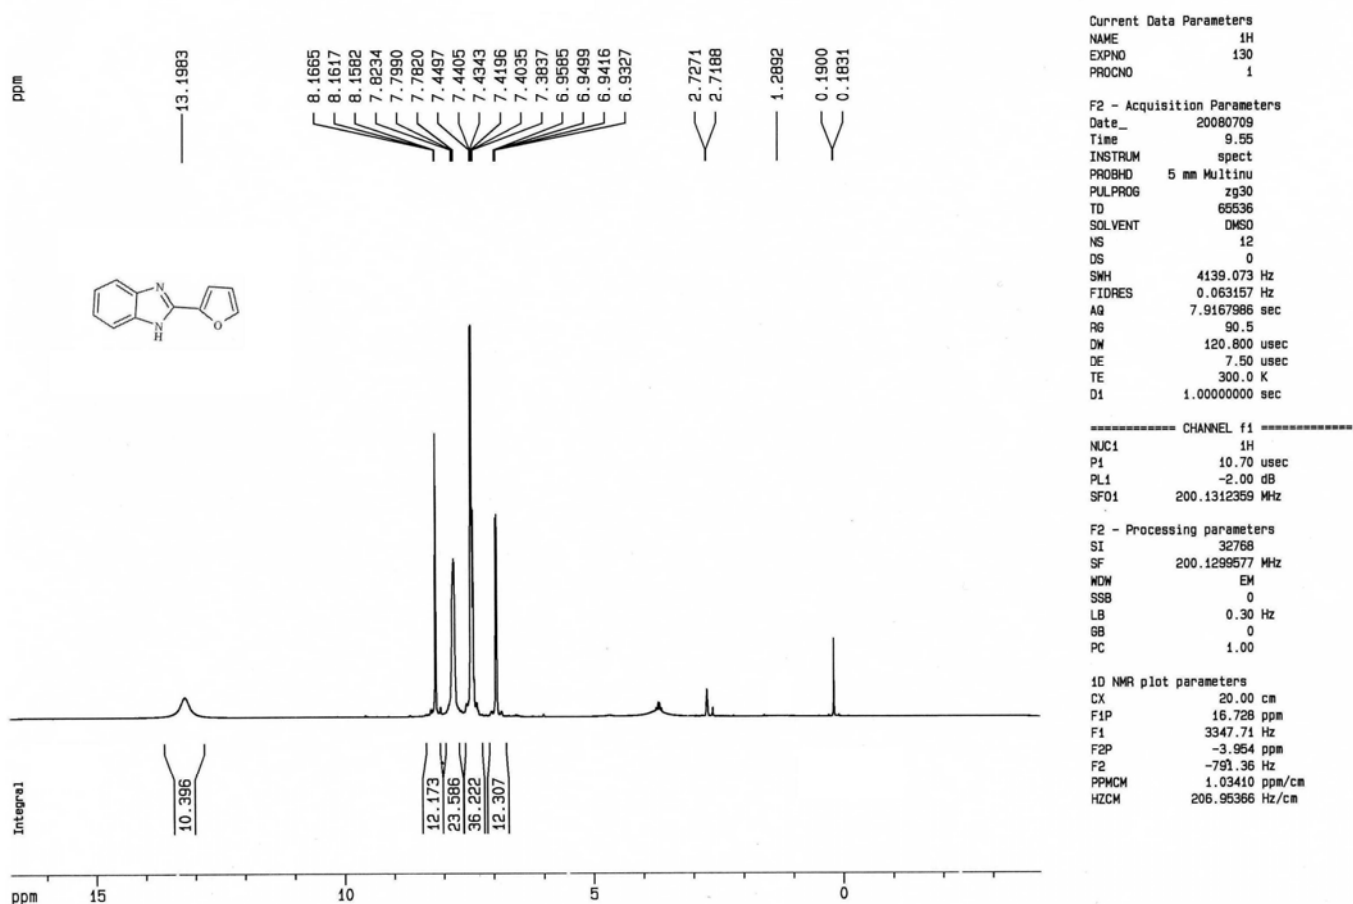

Table 3, Entry 10

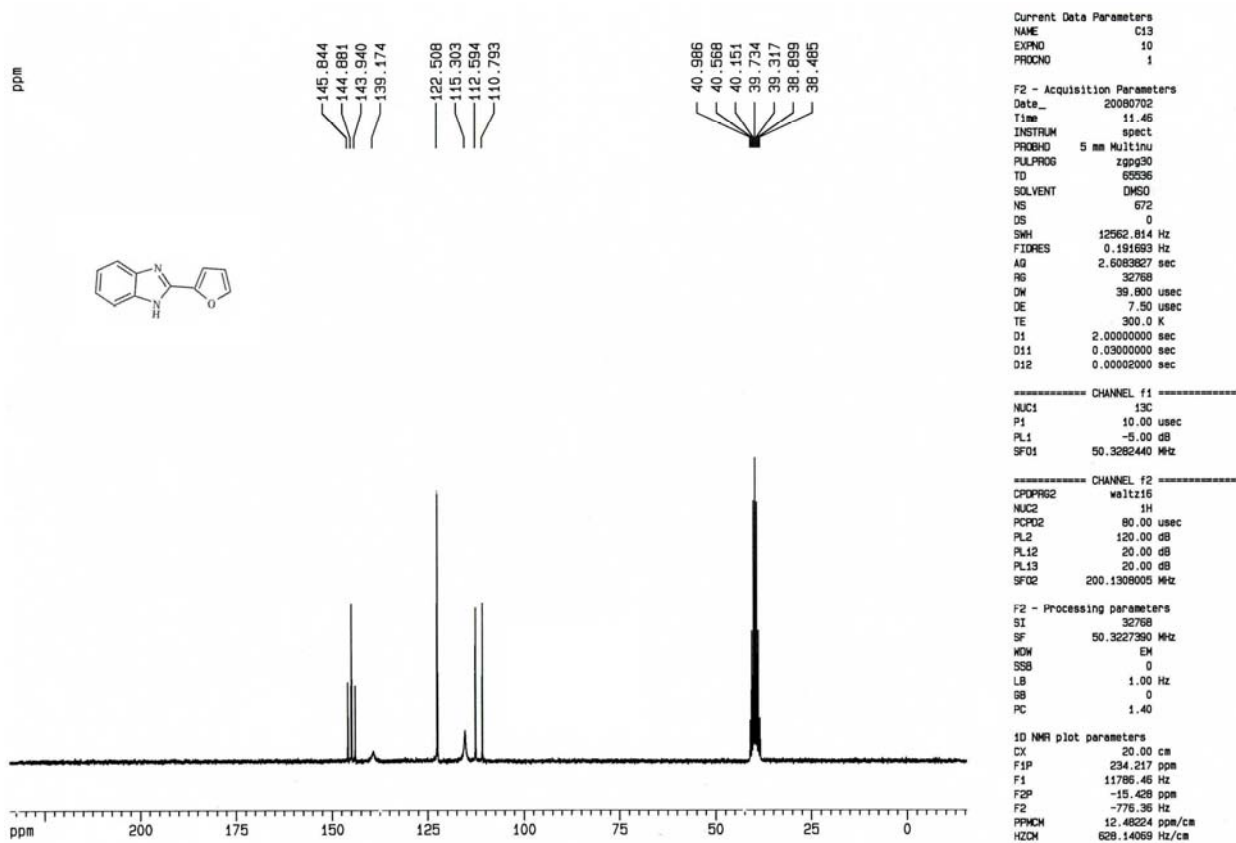

Table 3, Entry 15

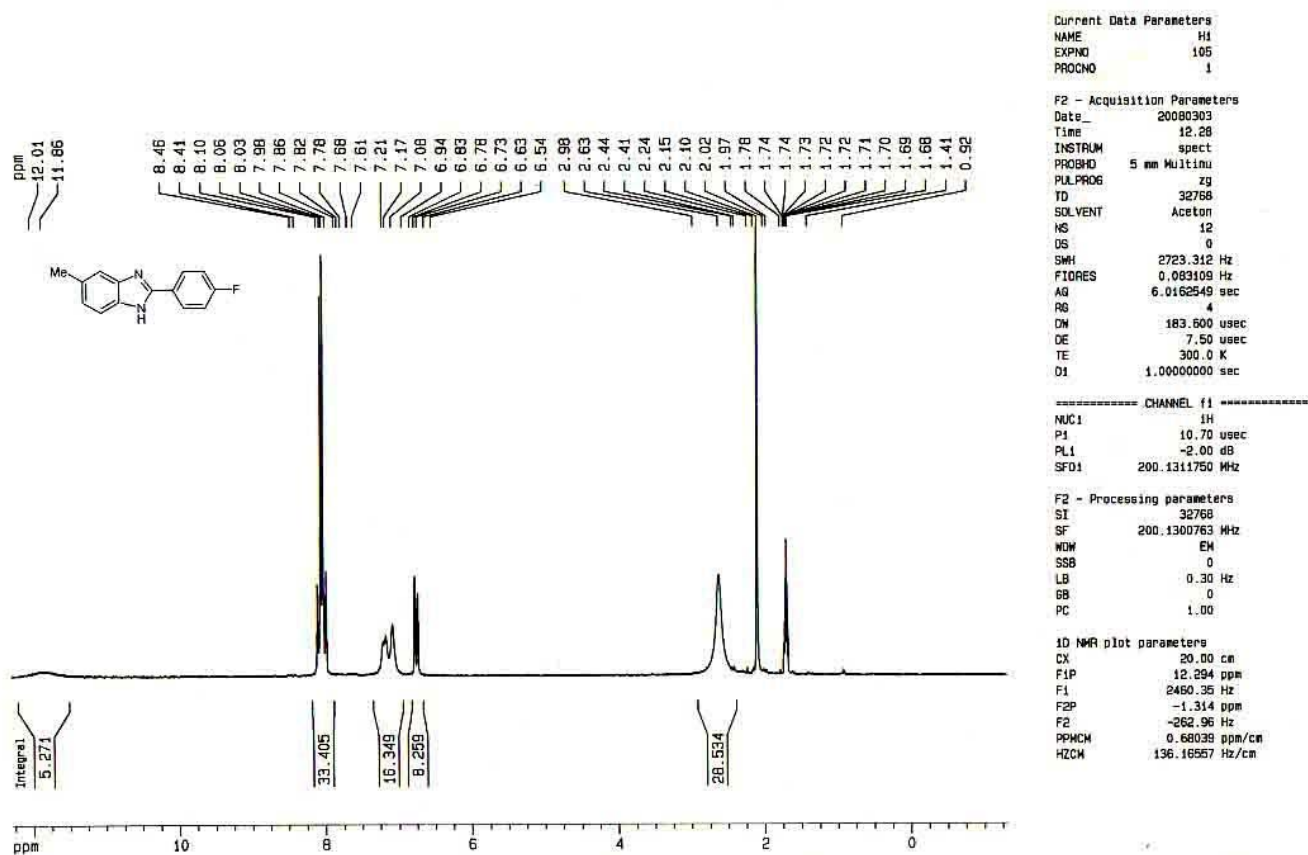

Table 3, Entry 15

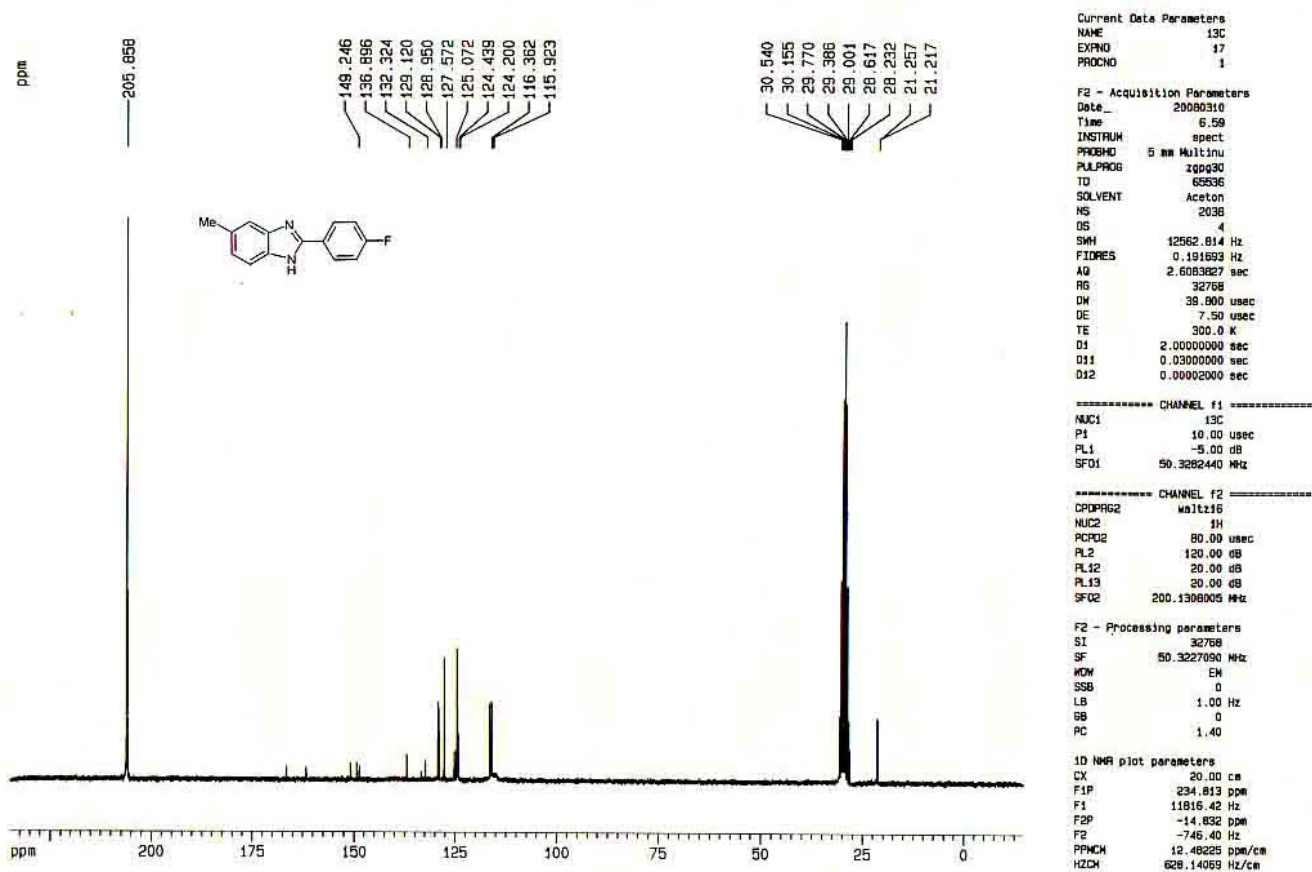

Table 3, Entry 22

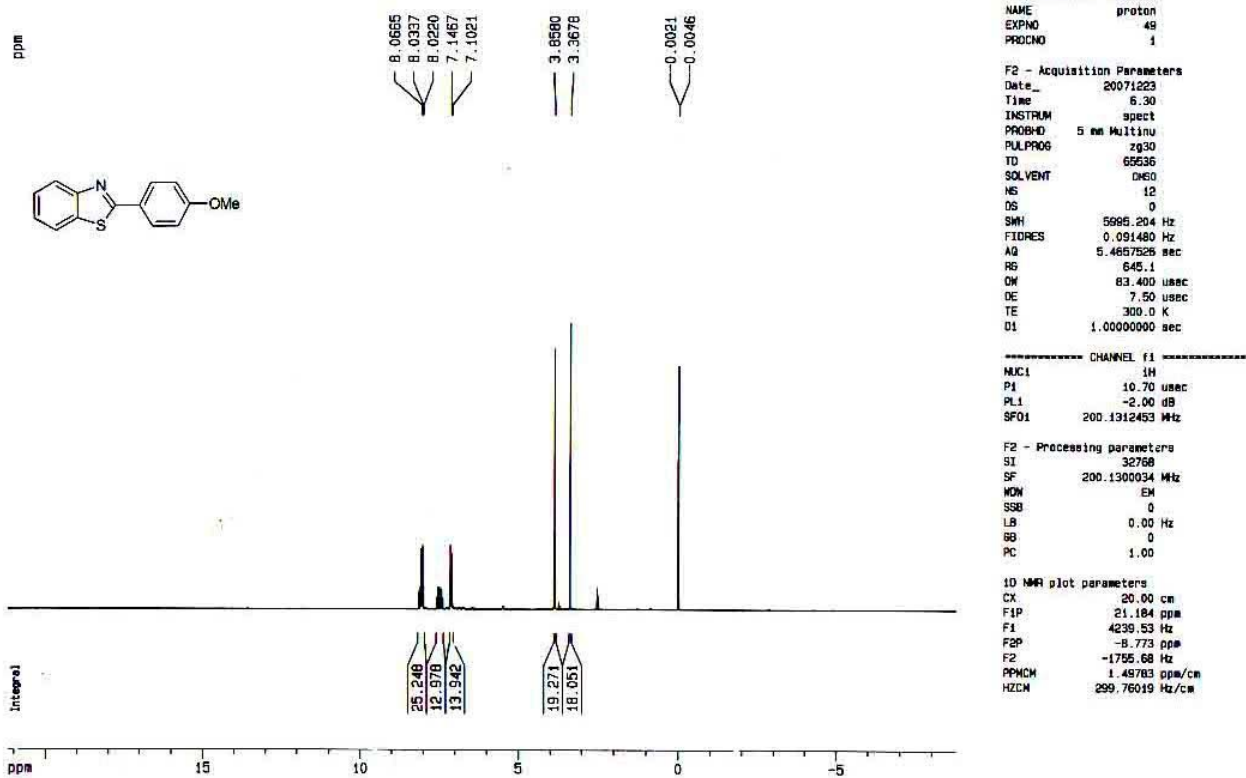

Table 3, Entry 22

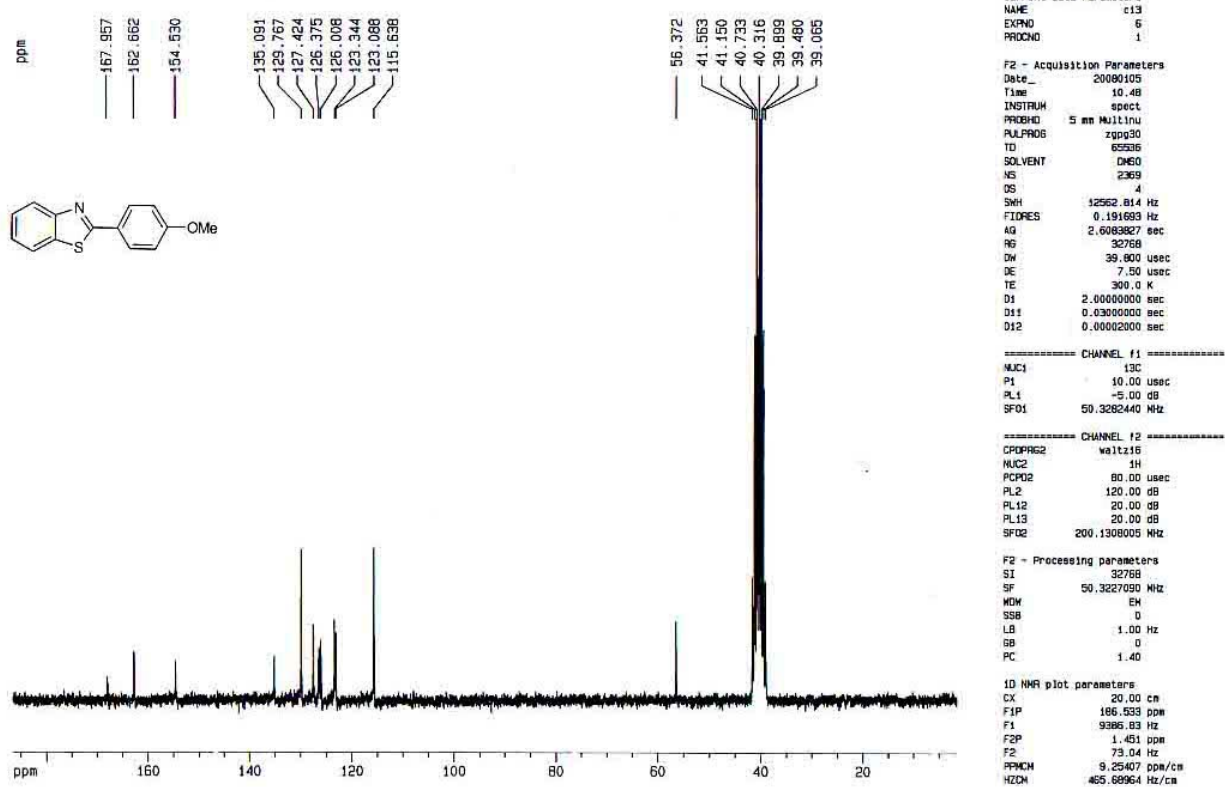

Table 3, Entry 30

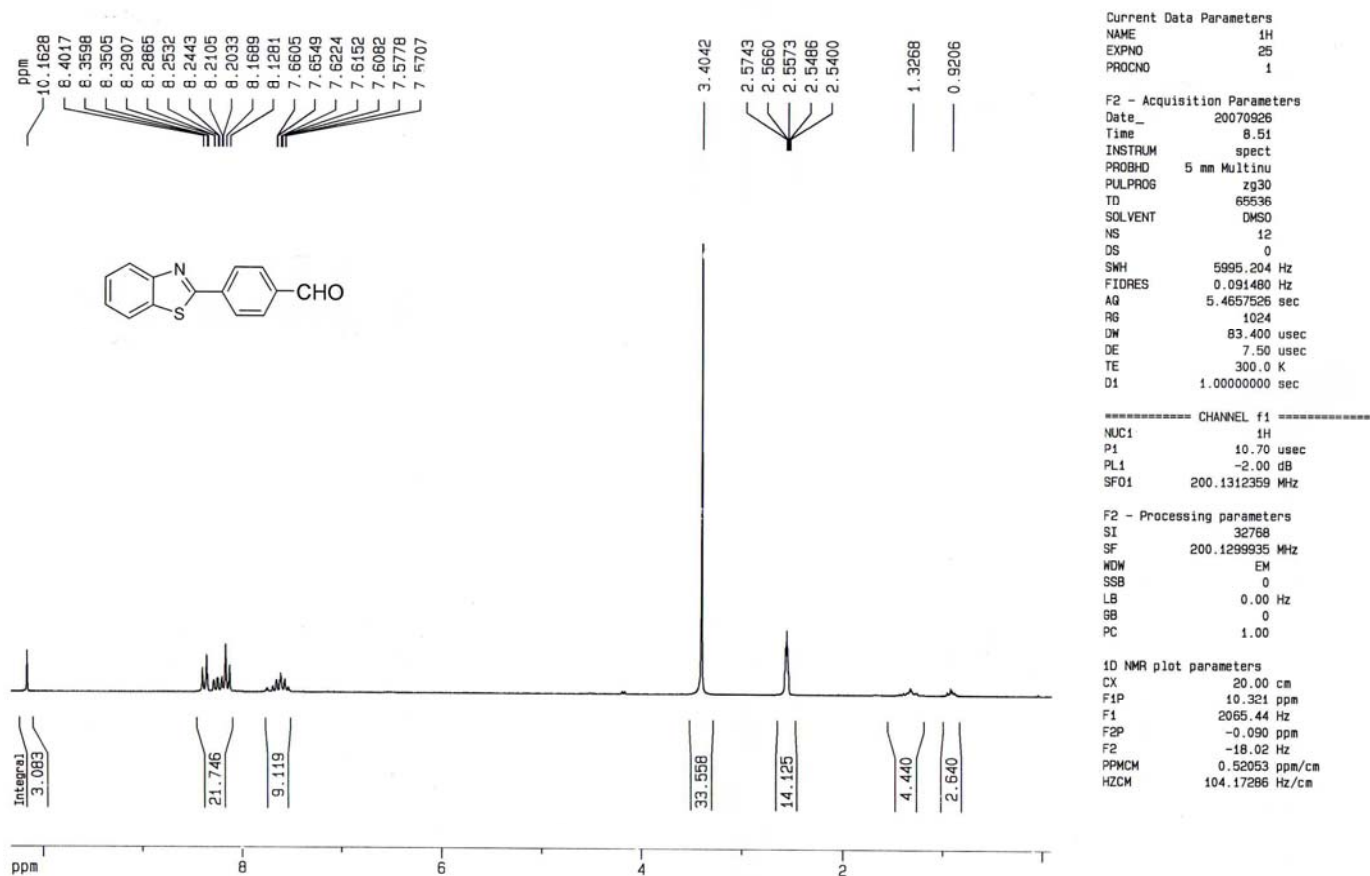

Table 3, Entry 30

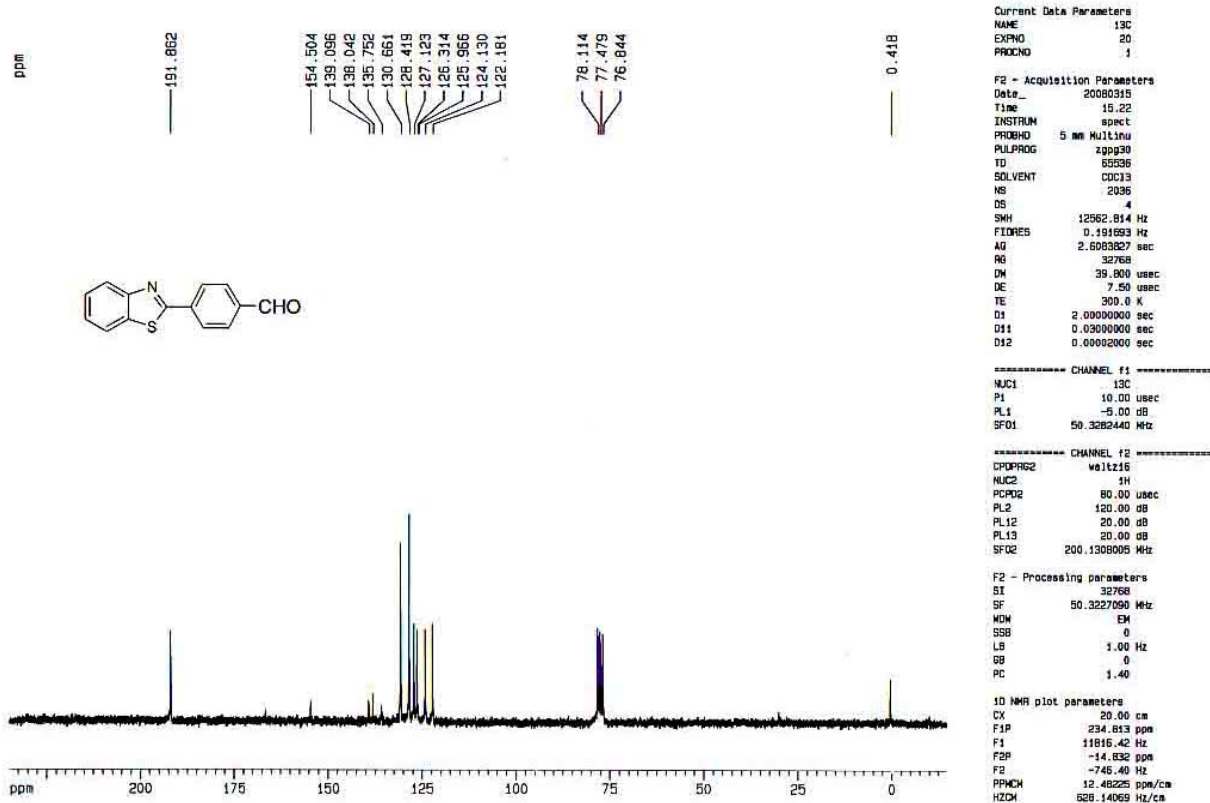

Table 3, Entry 32

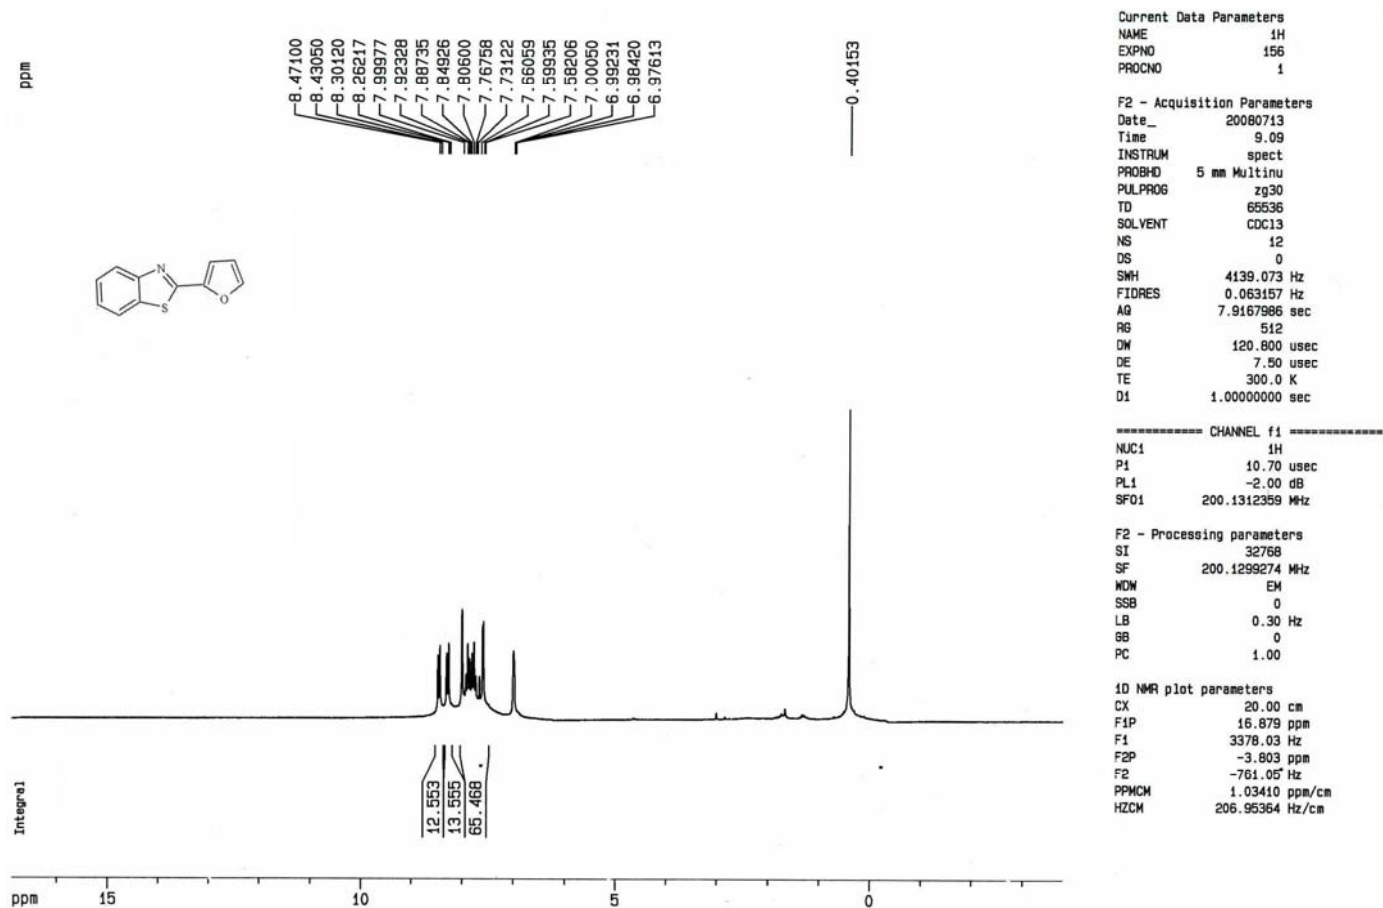

Table 3, Entry 32

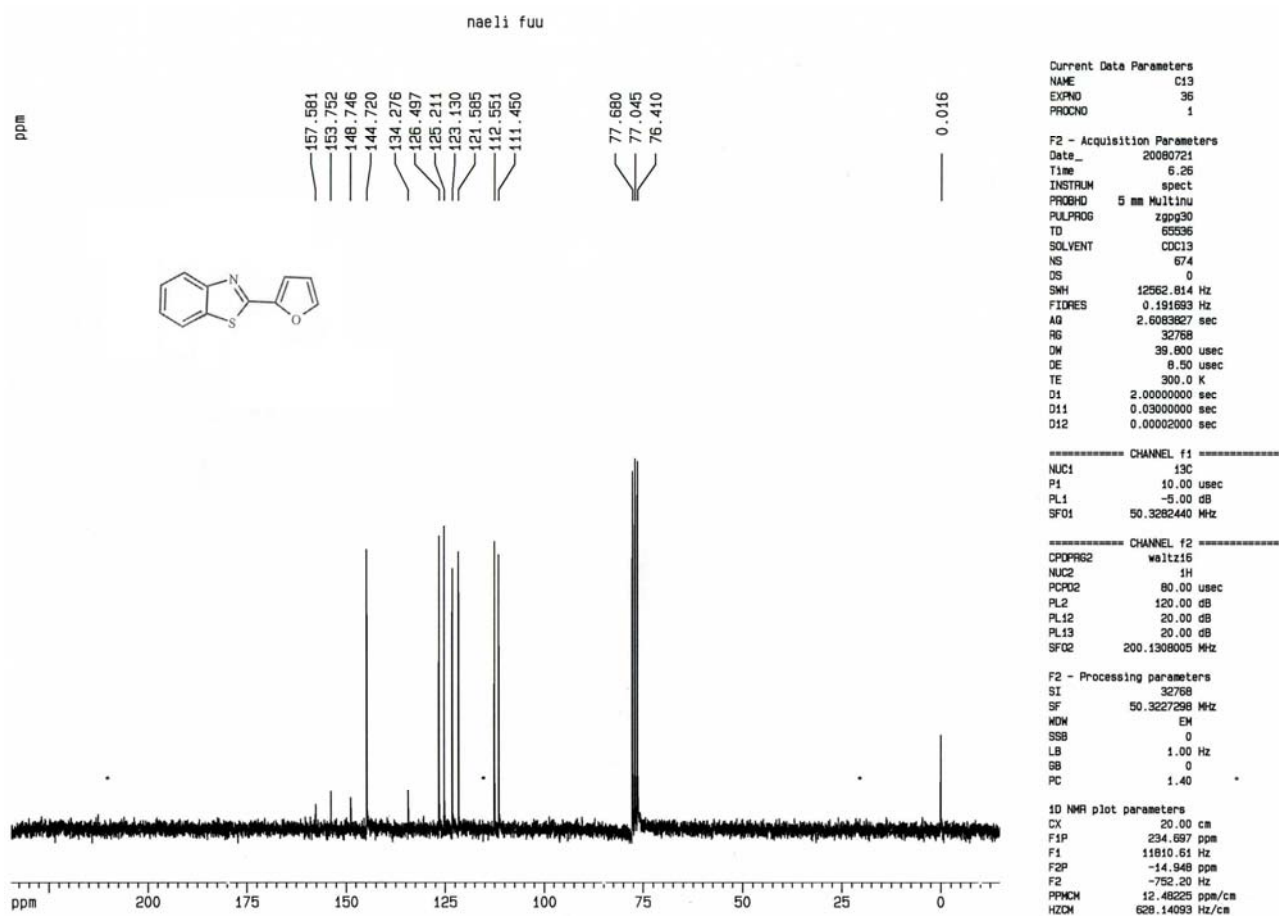

Supplementary Material (ESI) for Green Chemistry  
This journal is © The Royal Society of Chemistry 2010
